# Supplementary material for: Rhea, the reaction knowledgebase in 2022
Source: PubMed Central journal article supplement (PMC8728268; doi:10.1093/nar/gkab1016), 2021-11-10
Supplement: gkab1016_supplemental_file.pdf [file gkab1016_supplemental_file.pdf]

| Field name         | Example query                                                      | Query builder field > subfield label         | Description                                                                                                    |
|--------------------|--------------------------------------------------------------------|----------------------------------------------|----------------------------------------------------------------------------------------------------------------|
| chebi, chebi_exact | <a href="#">chebi:59871</a> ,<br><a href="#">chebi_exact:59871</a> | Reaction participants > ChEBI small molecule | Search small molecule by name, synonym, chemical class or identifier                                           |
| rhea-comp          | <a href="#">rhea-comp:10594</a>                                    | Reaction participants > Rhea macromolecule   | Search macromolecules (proteins, nucleic acids or Rhea polymer) by name or identifier                          |
| inchikey           | <a href="#">inchikey:VFRROHXSMXFLSN</a>                            | InChIKey                                     | Search by full or partial <a href="#">InChIKey</a>                                                             |
| rhea               | <a href="#">rhea:42796</a>                                         | Rhea reaction [id]                           | Search by Rhea identifier                                                                                      |
| uniprot            | <a href="#">uniprot:P32483</a>                                     | UniProtKB AC                                 | Search by <a href="#">UniProtKB accession</a>                                                                  |
| pubmed             | <a href="#">pubmed:29867142</a>                                    | PubMed                                       | Search by PubMed identifier                                                                                    |
| ec                 | <a href="#">ec:2.1.1.160</a>                                       | Enzyme classification [EC]                   | Search by complete or partial <a href="#">EC number</a>                                                        |
| go, go_exact       | <a href="#">go:0003884</a> ,<br><a href="#">go_exact:0003884</a>   | Gene Ontology [GO]                           | Search by <a href="#">Gene Ontology (GO)</a> 'Molecular Function' name or identifier                           |
| status             | <a href="#">status:approved</a>                                    | Reaction status > Approved                   | Search for reactions that are approved                                                                         |
| status             | <a href="#">status:preliminary</a>                                 | Reaction status > Preliminary                | Search for reactions with limited experimental evidence (may include unbalanced reactions for mass and charge) |
| ecocyc             | <a href="#">ecocyc:PABASYN-RXN</a>                                 | Cross-references > EcoCyc                    | Search by <a href="#">EcoCyc</a> reaction identifier                                                           |
| metacyc            | <a href="#">metacyc:PABASYN-RXN</a>                                | Cross-references > MetaCyc                   | Search by <a href="#">MetaCyc</a> reaction identifier                                                          |
| reactome           | <a href="#">reactome:R-HSA-193706.1</a>                            | Cross-references > Reactome                  | Search by <a href="#">Reactome</a> reaction identifier (limited to Hsa)                                        |
| kegg               | <a href="#">kegg:R01716</a>                                        | Cross-references > KEGG                      | Search by <a href="#">KEGG</a> reaction identifier                                                             |
| macie              | <a href="#">macie:M0283</a>                                        | Cross-references > M-CSA/MACiE               | Search by <a href="#">M-CSA/MACiE</a> reaction identifier                                                      |
| cas                | <a href="#">cas:57-88-5</a>                                        | Cross-references > CAS number                | Search by <a href="#">CAS Registry Number</a>                                                                  |
| beilstein          | <a href="#">beilstein:2060565</a>                                  | Cross-references > Beilstein                 | Search by <a href="#">Beilstein Registry Number</a>                                                            |
| transport          | <a href="#">transport:yes</a>                                      | Reaction types > Transport reactions         | Search for transport reactions                                                                                 |
| hasprotein         | <a href="#">hasprotein:yes</a>                                     | Reaction types > Involving proteins          | Search for reactions with participants that are proteins                                                       |
| hasnucleotide      | <a href="#">hasnucleotide:yes</a>                                  | Reaction types > Involving nucleic acids     | Search for reactions with participants that are nucleic acids                                                  |

**Supplementary Table 1: List of searchable fields in Rhea**

| <b>Parameter</b> | <b>Values</b>                        | <b>Description</b>                                                               |
|------------------|--------------------------------------|----------------------------------------------------------------------------------|
| query            | <i>string</i>                        | Query string. An empty query string will retrieve all entries in a data set      |
| columns          | comma-separated list of column names | Columns to include in the result (see Supplementary Table 3) (optional)          |
| format           | tsv                                  | Result format: tsv returns data for the selected columns as tab-separated values |
| limit            | <i>integer</i>                       | Maximum number of results to retrieve (optional)                                 |

**Supplementary Table 2:** Parameters that users can add to the URL for accessing Rhea search results.

| Column label                  | Column ID               | Value                                                                       |
|-------------------------------|-------------------------|-----------------------------------------------------------------------------|
| Reaction identifier           | rhea-id                 | Reaction identifier (with prefix RHEA)                                      |
| Equation                      | equation                | Textual description of the reaction equation                                |
| ChEBI name                    | chebi                   | Semicolon-separated list of ChEBI names used as reaction participants       |
| ChEBI identifier              | chebi-id                | Semicolon-separated list of ChEBI identifiers used as reaction participants |
| EC number                     | ec                      | Semicolon-separated list of EC numbers (with prefix EC)                     |
| Enzymes                       | uniprot                 | Number of proteins (UniProtKB entries) annotated with the Rhea reaction     |
| Gene Ontology                 | go                      | GO identifier (with prefix GO) and label                                    |
| PubMed                        | pubmed                  | semicolon-separated list of PubMed identifiers (without prefix)             |
| Cross-reference (EcoCyc)      | reaction-xref(EcoCyc)   | EcoCyc reaction identifier                                                  |
| Cross-reference (MetaCyc)     | reaction-xref(MetaCyc)  | MetaCyc reaction identifier                                                 |
| Cross-reference (KEGG)        | reaction-xref(KEGG)     | KEGG reaction identifier                                                    |
| Cross-reference (Reactome)    | reaction-xref(Reactome) | Reactome reaction identifier                                                |
| Cross-reference (M-CSA/MACiE) | reaction-xref(M-CSA)    | M-CSA reaction identifier                                                   |

**Supplementary Table 3:** Column names that users can add to the query URL for programmatic access.

| Topic                                                                                       | YouTube URL                                                                                           |
|---------------------------------------------------------------------------------------------|-------------------------------------------------------------------------------------------------------|
| The Rhea knowledgebase: key features & web interface – Guided tour #1                       | <a href="https://www.youtube.com/watch?v=XDcN8L5KqS8">https://www.youtube.com/watch?v=XDcN8L5KqS8</a> |
| The Rhea knowledgebase: web interface & reaction pages – Guided tour #2                     | <a href="https://www.youtube.com/watch?v=yWi3e7xbp_A">https://www.youtube.com/watch?v=yWi3e7xbp_A</a> |
| How to search for Rhea reactions involving specific chemical compounds                      | <a href="https://www.youtube.com/watch?v=0tow_vBNir8">https://www.youtube.com/watch?v=0tow_vBNir8</a> |
| How to search for the enzymes corresponding to a Rhea reaction in the UniProt knowledgebase | <a href="https://www.youtube.com/watch?v=n8X2b4uwN0Y">https://www.youtube.com/watch?v=n8X2b4uwN0Y</a> |
| How to search for Rhea reactions by enzyme class (EC number)                                | <a href="https://www.youtube.com/watch?v=yGbF8N2hqkk">https://www.youtube.com/watch?v=yGbF8N2hqkk</a> |
| How to search for Rhea reactions with the Gene Ontology (GO)                                | <a href="https://www.youtube.com/watch?v=uNYIMknEYok">https://www.youtube.com/watch?v=uNYIMknEYok</a> |

**Supplementary Table 4:** List of Rhea videos (guided tours and tutorials) available on the SIB YouTube channel.
